# Supplementary material for: Characterization of Purple Carrot Germplasm for Antioxidant Capacity and Root Concentration of Anthocyanins, Phenolics, and Carotenoids
Source: MDPI journal article supplement (doi:10.3390/plants12091796), 2023-04-27
Supplement: s1 [file s1]

## **SUPPLEMENTARY MATERIAL**

### **Characterization of Purple Carrot Germplasm for Antioxidant Capacity and Root Concentration of Anthocyanins, Phenolics, and Carotenoids**

María Belén Pérez, Sofía Carvajal, Vanesa Beretta, Florencia Bannoud, María Florencia Fangio, Federico Berli, Ariel Fontana, María Victoria Salomón, Roxana Gonzalez, Lucia Valerga, Jorgelina C. Altamirano, Mehtap Yildiz, Massimo Iorizzo, Philipp W. Simon and Pablo F. Cavagnaro

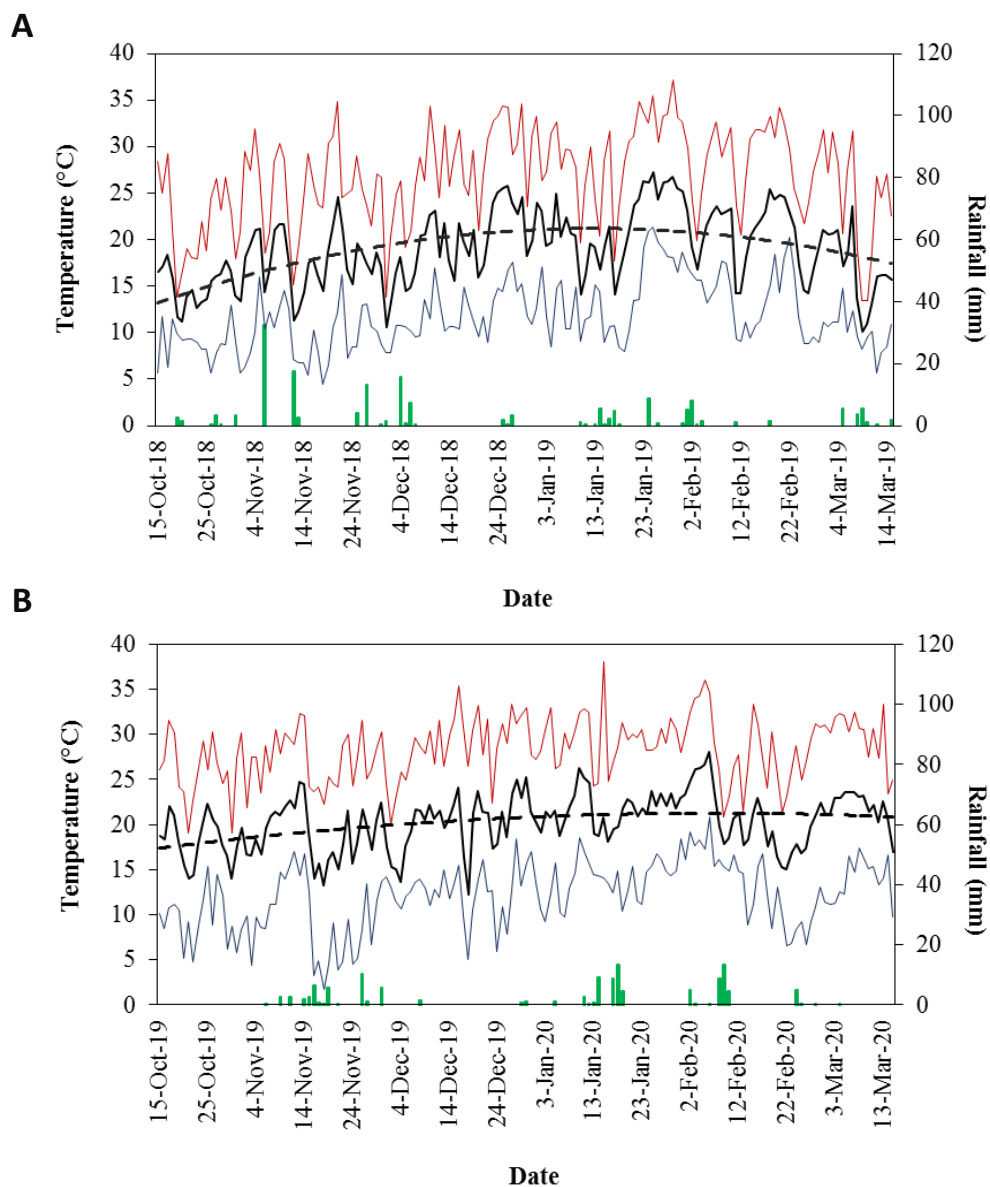

**Supplementary Figure S1.** Time-course variation for maximum (red line), minimum (blue line), and mean day temperature (black line) with adjusted trend line (black dashed line), and rainfall (green bars), at the cultivation site (Lujan de Cuyo, Mendoza, Argentina) for the period from carrot sowing to harvest (October 15 – March 15).

**Supplementary Table S1.** Variation for root concentration of individual and combined anthocyanin pigments for 27 carrot accessions, by year of cultivation.

| Acc. <sup>5</sup> | Year | Total ANT <sup>#</sup><br>Mean ± SE | Sum AA<br>Mean ± SE (%) | Sum NAA<br>Mean ± SE (%) | Cy3XG<br>Mean (%) | Cy3XGG<br>Mean (%) | Cy3XFGG<br>Mean (%) | Cy3XSGG<br>Mean (%) | Cy3XCGG<br>Mean (%) |
|-------------------|------|-------------------------------------|-------------------------|--------------------------|-------------------|--------------------|---------------------|---------------------|---------------------|
| <b>1</b>          | 2018 | 3014.0 ± 236.3                      | 2230.4 ± 250.6 (74.0)   | 783.6 ± 209.9 (26.0)     | 678.5 (22.5)      | 105.1 (3.5)        | 1746.4 (57.9)       | 287.1 (9.5)         | 196.8 (6.5)         |
|                   | 2019 | 3330.1 ± 440.4                      | 2647.4 ± 133.2 (79.5)   | 682.7 ± 343.0 (20.5)     | 601.8 (18.1)      | 80.9 (2.4)         | 1986.1 (59.6)       | 244.0 (7.3)         | 417.3 (12.5)        |
|                   | Mean | 3172.1 ± 338.4                      | 2438.9 ± 191.9 (76.8)   | 733.2 ± 276.5 (23.2)     | 640.2 (20.2)      | 93.0 (2.9)         | 1866.3 (58.8)       | 265.6 (8.4)         | 307.1 (9.7)         |
| <b>2</b>          | 2018 | 2004.7 ± 169.7                      | 1794.9 ± 165.5 (89.5)   | 209.8 ± 75.8 (10.5)      | 77.9 (3.9)        | 131.9 (6.6)        | 1398.3 (69.8)       | 281.2 (14.0)        | 115.4 (5.8)         |
|                   | 2019 | 1443.4 ± 124.0                      | 1188.0 ± 99.2 (82.3)    | 255.4 ± 291.1 (17.7)     | 183.2 (12.7)      | 72.2 (5.0)         | 1034.1 (71.6)       | 74.5 (5.2)          | 79.4 (5.5)          |
|                   | Mean | 1724.1 ± 146.9                      | 1491.5 ± 132.4 (85.9)   | 232.6 ± 183.5 (14.1)     | 130.6 (7.6)       | 102.1 (5.9)        | 1216.2 (70.5)       | 177.9 (10.3)        | 97.4 (5.6)          |
| <b>3</b>          | 2018 | 1904.4 ± 311.9                      | 1592.9 ± 248.6 (83.6)   | 311.4 ± 77.9 (16.4)      | 154.1 (8.1)       | 157.3 (8.3)        | 100.2 (5.3)         | 1483.8 (77.9)       | 8.9 (0.5)           |
|                   | 2019 | 1831.3 ± 242.0                      | 1489.7 ± 285.2 (81.3)   | 341.6 ± 77.0 (18.7)      | 168.1 (9.2)       | 173.5 (9.5)        | 305.9 (16.7)        | 1159.0 (63.3)       | 24.8 (1.4)          |
|                   | Mean | 1867.9 ± 277.0                      | 1541.3 ± 266.9 (82.5)   | 326.5 ± 77.5 (17.5)      | 161.1 (8.6)       | 165.4 (8.9)        | 203.1 (10.9)        | 1321.4 (70.7)       | 16.9 (0.9)          |
| <b>4</b>          | 2018 | 1768.0 ± 126.5                      | 1476.3 ± 110.9 (83.5)   | 291.7 ± 67.2 (16.5)      | 226.4 (12.8)      | 65.2 (3.7)         | 1139.4 (64.4)       | 252.2 (14.3)        | 84.8 (4.8)          |
|                   | 2019 | 2027.0 ± 409.4                      | 1270.0 ± 300.7 (61.5)   | 779.0 ± 114.4 (38.5)     | 588.6 (29.0)      | 190.4 (9.4)        | 1076.3 (53.1)       | 86.7 (4.3)          | 83.1 (4.1)          |
|                   | Mean | 1897.5 ± 268.0                      | 1373.2 ± 205.8 (72.5)   | 535.4 ± 90.8 (27.5)      | 407.5 (21.5)      | 127.8 (6.7)        | 1107.9 (58.4)       | 169.5 (8.9)         | 84.0 (4.4)          |
| <b>5</b>          | 2018 | 1770.9 ± 273.3                      | 1008.9 ± 189.1 (54.2)   | 752.0 ± 131.3 (45.8)     | 558.6 (31.5)      | 253.4 (14.3)       | 336.5 (19.0)        | 600.0 (33.9)        | 22.5 (1.3)          |
|                   | 2019 | 2015.1 ± 268.7                      | 1165.2 ± 170.8 (56.8)   | 849.9 ± 98.2 (43.2)      | 645.8 (32.0)      | 224.1 (11.1)       | 508.9 (25.3)        | 618.7 (30.7)        | 17.6 (0.9)          |
|                   | Mean | 1893.0 ± 271.0                      | 1087.1 ± 180.0 (55.5)   | 801.0 ± 114.8 (44.5)     | 602.2 (31.8)      | 238.8 (12.6)       | 422.7 (22.3)        | 609.4 (32.2)        | 20.1 (1.1)          |
| <b>6</b>          | 2018 | 1464.3 ± 326.1                      | 1170.0 ± 390.5 (76.5)   | 294.3 ± 67.1 (23.5)      | 230.4 (15.7)      | 113.9 (7.8)        | 153.1 (10.5)        | 962.5 (65.7)        | 4.4 (0.3)           |
|                   | 2019 | 1603.6 ± 312.8                      | 1348.8 ± 254.2 (84.7)   | 254.8 ± 78.2 (15.3)      | 173.1 (10.8)      | 81.8 (5.1)         | 131.7 (8.2)         | 1202.9 (75.0)       | 14.1 (0.9)          |
|                   | Mean | 1534.0 ± 319.5                      | 1259.4 ± 322.4 (80.6)   | 274.6 ± 72.7 (19.4)      | 201.8 (13.2)      | 97.9 (6.4)         | 142.4 (9.3)         | 1082.7 (70.6)       | 9.3 (0.6)           |
| <b>7</b>          | 2018 | 1299.3 ± 136.7                      | 1242.6 ± 124.5 (95.6)   | 56.7 ± 14.6 (4.4)        | 29.9 (2.3)        | 26.8 (2.1)         | 970.3 (74.7)        | 257.6 (19.8)        | 14.7 (1.1)          |
|                   | 2019 | 1504.8 ± 213.0                      | 1402.1 ± 207.1 (93.2)   | 102.7 ± 9.7 (6.8)        | 72.7 (4.8)        | 29.9 (2.0)         | 1221.5 (81.2)       | 88.0 (5.8)          | 92.6 (6.2)          |
|                   | Mean | 1402.1 ± 174.9                      | 1322.4 ± 165.8 (94.4)   | 79.7 ± 12.2 (5.6)        | 51.3 (3.7)        | 28.4 (2.0)         | 1095.9 (78.2)       | 172.8 (12.3)        | 53.7 (3.8)          |
| <b>8</b>          | 2018 | 820.2 ± 94.8                        | 798.4 ± 100.3 (97.5)    | 21.8 ± 8.4 (2.5)         | 17.5 (2.1)        | 4.4 (0.5)          | 194.8 (24.8)        | 594.6 (71.5)        | 9.0 (1.1)           |
|                   | 2019 | 511.4 ± 124.3                       | 496.5 ± 127.9 (96.6)    | 14.9 ± 5.2 (3.4)         | 9.7 (1.9)         | 5.2 (1.0)          | 121.3 (22.7)        | 369.5 (73.3)        | 5.7 (1.1)           |
|                   | Mean | 665.8 ± 109.6                       | 647.5 ± 114.1 (97.1)    | 18.4 ± 6.8 (2.9)         | 13.6 (2.0)        | 4.8 (0.7)          | 158.1 (23.7)        | 482.1 (72.4)        | 7.4 (1.1)           |
| <b>9</b>          | 2019 | 628.1 ± 179.7                       | 590.0 ± 149.5 (94.0)    | 37.7 ± 30.2 (6.0)        | 28.9 (4.6)        | 8.8 (1.4)          | 513.6 (81.8)        | 76.7 (12.2)         | nd (0.0)            |
| <b>10</b>         | 2019 | 411.4 ± 101.8                       | 355.0 ± 91.1 (86.3)     | 56.4 ± 10.7 (13.7)       | 56.4 (13.7)       | 0.0 (0.0)          | 354.0 (86.0)        | 0.0 (0.0)           | 1.0 (0.2)           |
| <b>11</b>         | 2018 | 345.4 ± 44.5                        | 334.2 ± 42.9 (95.6)     | 9.1 ± 1.7 (4.4)          | 5.1 (1.5)         | 10.1 (2.9)         | 302.2 (87.5)        | 13.2 (3.8)          | 14.8 (4.3)          |
|                   | 2019 | 480.3 ± 85.8                        | 452.7 ± 82.6 (98.7)     | 12.5 ± 3.2 (1.3)         | 2.3 (0.5)         | 5.2 (1.1)          | 425.2 (88.5)        | 27.6 (5.7)          | 20.0 (4.2)          |
|                   | Mean | 412.9 ± 65.2                        | 393.5 ± 62.8 (97.2)     | 10.8 ± 2.5 (2.8)         | 3.7 (0.9)         | 7.7 (1.9)          | 363.7 (88.1)        | 20.4 (4.9)          | 17.4 (4.2)          |
| <b>12</b>         | 2018 | 295.5 ± 32.4                        | 268.8 ± 25.9 (90.9)     | 26.8 ± 2.6 (9.1)         | 15.9 (5.4)        | 10.8 (3.7)         | 212.7 (72.0)        | 54.0 (18.3)         | 2.0 (0.7)           |
|                   | 2019 | 386.8 ± 52.0                        | 336.7 ± 39.1 (87.0)     | 50.1 ± 15.1 (13.0)       | 29.2 (7.5)        | 20.9 (5.4)         | 286.2 (74.0)        | 33.1 (8.6)          | 17.4 (4.5)          |
|                   | Mean | 341.2 ± 42.2                        | 302.8 ± 32.5 (89.0)     | 38.5 ± 8.9 (11.0)        | 22.6 (6.6)        | 15.9 (4.6)         | 249.5 (73.1)        | 43.6 (12.8)         | 9.7 (2.8)           |
| <b>13</b>         | 2018 | 185.7 ± 45.0                        | 187.8 ± 44.0 (98.3)     | 2.9 ± 1.1 (1.7)          | 1.3 (0.7)         | 1.6 (0.9)          | 150.8 (81.2)        | 28.4 (15.3)         | 3.6 (1.9)           |
|                   | 2019 | 375.8 ± 70.0                        | 360.9 ± 69.5 (99.1)     | 4.8 ± 1.5 (0.9)          | 1.1 (0.3)         | 2.7 (0.7)          | 312.3 (83.1)        | 52.9 (14.1)         | 6.7 (1.8)           |
|                   | Mean | 280.8 ± 57.5                        | 274.4 ± 56.8 (98.7)     | 3.9 ± 1.3 (1.3)          | 1.2 (0.4)         | 2.2 (0.8)          | 231.6 (82.5)        | 40.7 (14.5)         | 5.2 (1.8)           |
| <b>14</b>         | 2018 | 246.7 ± 55.0                        | 217.8 ± 38.8 (88.2)     | 29.1 ± 12.3 (11.8)       | 27.1 (11.0)       | 1.8 (0.7)          | 149.7 (60.7)        | 61.1 (24.8)         | 7.0 (2.8)           |
|                   | 2019 | 294.9 ± 57.5                        | 266.2 ± 56.9 (91.4)     | 28.7 ± 8.6 (8.6)         | 23.0 (7.8)        | 2.3 (0.8)          | 175.5 (59.5)        | 87.9 (29.8)         | 6.1 (2.1)           |
|                   | Mean | 270.8 ± 56.3                        | 242.0 ± 47.9 (89.8)     | 28.9 ± 10.5 (10.2)       | 25.1 (9.3)        | 2.1 (0.8)          | 162.6 (60.0)        | 74.5 (27.5)         | 6.6 (2.4)           |
| <b>15</b>         | 2018 | 235.2 ± 34.8                        | 221.2 ± 31.8 (94.0)     | 14.4 ± 4.2 (6.0)         | 8.9 (3.8)         | 5.1 (2.2)          | 203.0 (86.3)        | 15.4 (6.5)          | 2.8 (1.2)           |

Supplementary Table S1 - continued

| Acc. <sup>‡</sup> | Year | Total ANT <sup>#</sup><br>Mean ± SE | Sum AA<br>Mean ± SE (%) | Sum NAA<br>Mean ± SE (%) | Cy3XG<br>Mean (%) | Cy3XGG<br>Mean (%) | Cy3XFGG<br>Mean (%) | Cy3XSGG<br>Mean (%) | Cy3XCGG<br>Mean (%) |
|-------------------|------|-------------------------------------|-------------------------|--------------------------|-------------------|--------------------|---------------------|---------------------|---------------------|
| <b>16</b>         | 2018 | 95.6 ± 8.1                          | 81.1 ± 5.0 (85.3)       | 14.5 ± 4.7 (14.7)        | 11.2 (11.7)       | 3.3 (3.5)          | 66.5 (69.6)         | 13.5 (14.1)         | 1.0 (1.0)           |
|                   | 2019 | 84.2 ± 11.1                         | 71.0 ± 8.9 (83.6)       | 13.2 ± 4.9 (16.4)        | 10.1 (12.0)       | 3.1 (3.7)          | 59.4 (70.5)         | 10.7 (12.7)         | 0.9 (1.1)           |
|                   | Mean | 89.9 ± 9.6                          | 76.1 ± 7.0 (84.5)       | 13.9 ± 4.8 (15.5)        | 10.7 (11.8)       | 3.2 (3.6)          | 63.0 (70.0)         | 12.1 (13.5)         | 1.0 (1.1)           |
| <b>17</b>         | 2019 | 80.4 ± 16.5                         | 80.4 ± 16.5 (100)       | 0.0 ± 0.0 (0.0)          | nd (0.0)          | nd (0.0)           | 78.9 (98.1)         | 1.5 (1.9)           | nd (0.0)            |
| <b>18</b>         | 2018 | 51.5 ± 10.7                         | 47.9 ± 10.3 (92.7)      | 3.6 ± 0.6 (7.3)          | 2.5 (5.0)         | 1.1 (2.1)          | 33.6 (65.2)         | 13.4 (26.0)         | 0.9 (1.7)           |
|                   | 2019 | 26.5 ± 4.6                          | 25.0 ± 4.3 (94.4)       | 1.5 ± 0.3 (5.6)          | 0.9 (3.5)         | 0.6 (2.3)          | 16.8 (63.4)         | 7.7 (29.1)          | 0.5 (1.9)           |
|                   | Mean | 39.0 ± 7.7                          | 36.5 ± 7.3 (93.6)       | 2.6 ± 0.5 (6.4)          | 1.7 (4.4)         | 0.9 (2.2)          | 25.2 (64.6)         | 10.6 (27.1)         | 0.7 (1.8)           |
| <b>19</b>         | 2018 | 40.5 ± 10.0                         | 38.7 ± 9.9 (95.7)       | 1.7 ± 0.3 (4.3)          | 1.0 (2.5)         | 0.8 (2.0)          | 20.3 (50.1)         | 17.9 (44.2)         | 0.5 (1.2)           |
|                   | 2019 | 34.1 ± 8.4                          | 32.4 ± 8.1 (94.5)       | 1.7 ± 0.4 (5.5)          | 0.7 (2.1)         | 1.0 (2.9)          | 17.2 (50.4)         | 14.2 (41.6)         | 1.0 (2.9)           |
|                   | Mean | 37.3 ± 9.2                          | 35.6 ± 9.0 (95.1)       | 1.7 ± 0.4 (4.9)          | 0.9 (2.3)         | 0.9 (2.4)          | 18.8 (50.3)         | 16.1 (43.0)         | 0.8 (2.0)           |
| <b>20</b>         | 2019 | 29.6 ± 9.9                          | 29.2 ± 9.5 (99.2)       | 0.4 ± 0.3 (0.8)          | 0.4 (1.4)         | 0.0 (0.0)          | 29.2 (98.6)         | nd (0.0)            | nd (0.0)            |
| <b>21</b>         | 2018 | 28.9 ± 9.2                          | 25.5 ± 7.7 (88.2)       | 3.4 ± 1.6 (11.8)         | 0.6 (2.1)         | 2.8 (9.7)          | 14.5 (50.2)         | 10.8 (37.4)         | 0.2 (0.7)           |
|                   | 2019 | 32.0 ± 10.9                         | 27.1 ± 8.4 (84.1)       | 5.0 ± 2.5 (5.9)          | 3.2 (10.0)        | 1.9 (5.9)          | 17.5 (54.7)         | 8.7 (27.2)          | 0.7 (2.2)           |
|                   | Mean | 30.5 ± 10.1                         | 26.3 ± 8.1 (86.2)       | 4.2 ± 2.1 (13.8)         | 1.9 (6.2)         | 2.4 (7.7)          | 16.0 (52.5)         | 9.8 (32.0)          | 0.5 (1.5)           |
| <b>22</b>         | 2018 | 27.0 ± 7.9                          | 24.9 ± 7.7 (91.4)       | 2.1 ± 0.7 (8.6)          | 1.4 (5.2)         | 0.7 (2.6)          | 13.9 (51.5)         | 10.8 (40.0)         | 0.2 (0.7)           |
|                   | 2019 | 19.0 ± 3.9                          | 17.9 ± 4.2 (93.7)       | 1.1 ± 0.4 (6.3)          | 0.8 (4.2)         | 0.4 (2.1)          | 9.8 (51.6)          | 7.9 (41.6)          | 0.1 (0.5)           |
|                   | Mean | 23.0 ± 5.9                          | 21.4 ± 6.0 (92.6)       | 1.6 ± 0.6 (7.4)          | 1.1 (4.8)         | 0.6 (2.4)          | 11.9 (51.5)         | 9.4 (40.7)          | 0.2 (0.7)           |
| <b>23</b>         | 2019 | 25.8 ± 7.89                         | 21.8 ± 6.1 (84.6)       | 4.0 ± 1.9 (15.4)         | 2.4 (9.3)         | 1.6 (6.1)          | 14.5 (56.2)         | 6.8 (26.4)          | 0.5 (2.1)           |
| <b>24</b>         | 2018 | 19.1 ± 5.90                         | 18.3 ± 6.2 (94.6)       | 0.3 ± 0.2 (5.4)          | 0.4 (1.8)         | 0.3 (1.8)          | 7.6 (39.6)          | 10.5 (55.1)         | 0.3 (1.3)           |
|                   | 2019 | 30.1 ± 6.63                         | 29.2 ± 7.1 (97.2)       | 1.0 ± 0.5 (2.8)          | 0.6 (2.0)         | 0.3 (1.1)          | 12.4 (41.1)         | 16.4 (54.6)         | 0.4 (1.2)           |
|                   | Mean | 24.6 ± 6.27                         | 23.7 ± 6.7 (95.9)       | 0.6 ± 0.3 (4.1)          | 0.5 (2.0)         | 0.3 (1.4)          | 10.0 (40.5)         | 13.5 (54.8)         | 0.3 (1.3)           |
| <b>25</b>         | 2019 | 18.5 ± 5.6                          | 18.5 ± 5.6 (100)        | 0.0 ± 0.0 (0.0)          | nd (0.0)          | nd (0.0)           | nd (0.0)            | 18.5 (100)          | nd (0.0)            |
| <b>26</b>         | 2019 | 2.1 ± 0.4                           | 2.1 ± 0.4 (100)         | 0.0 ± 0.0 (0.0)          | nd (0.0)          | nd (0.0)           | 2.1 (100)           | nd (0.0)            | nd (0.0)            |
| <b>27</b>         | 2018 | 1.5 ± 0.6                           | 1.3 ± 0.5 (86.5)        | 0.2 ± 0.2 (13.5)         | 0.2 (10.8)        | 0.04 (2.7)         | 1.1 (74.3)          | 0.15 (10.1)         | 0.03 (2.0)          |
|                   | 2019 | 0.8 ± 0.1                           | 0.6 ± 0.1 (79.1)        | 0.2 ± 0.0 (20.9)         | 0.1 (16.9)        | 0.03 (3.9)         | 0.5 (68.8)          | 0.06 (7.8)          | 0.02 (2.6)          |
|                   | Mean | 1.1 ± 0.4                           | 0.9 ± 0.3 (82.8)        | 0.2 ± 0.1 (17.2)         | 0.1 (12.9)        | 0.04 (3.1)         | 0.8 (72.4)          | 0.11 (9.3)          | 0.03 (2.2)          |

<sup>‡</sup> Accession numbers refer to the carrot materials described in Table 1. Values are means of three replicates, expressed as mg kg<sup>-1</sup> fw ± SE. Percentages (%) are relative to the total anthocyanin content. AA. acylated anthocyanins; NAA. non-acylated anthocyanins; nd. not detected; Cy3XG. cyanidin-3-(2"-xylose-galactoside); Cy3XGG. cyanidin-3-(2"-xylose-6-glucose-galactoside); Cy3XFGG. Cyanidin-3-(2"-xylose-6"-feruloyl-glucose-galactoside); Cy3XSGG. cyanidin-3-(2"-xylose-6"-sinapoyl-glucose-galactoside); Cy3XCGG. cyanidin-3-(2"-xylose-6"- (4-coumaroyl)glucose-galactoside). <sup>#</sup> Total anthocyanin content was calculated as the sum of the individual pigments quantified by HPLC analysis.

**Supplementary Table S2.** Edaphic characteristics of the carrot growing site

| Edaphic parameter                            | Value (interpretation) |
|----------------------------------------------|------------------------|
| pH                                           | 7.5                    |
| Salinity (dS/m)                              | 1.8 (not saline)       |
| Total Nitrogen (N) (mg/kg)                   | 1050 (high)            |
| Organic matter (%)                           | 5.6                    |
| Available phosphorus (P) (mg/kg)             | 2.7                    |
| Exchangeable potassium (K)<br>(mg/kg)        | 205                    |
| C/N ratio                                    | 8.6                    |
| Texture                                      | Silty loam             |
| Sedimentation volume (cm <sup>3</sup> /100g) | 112                    |

Soil analyses were performed at the Laboratory of Edaphology, Faculty of Agricultural Sciences, National University of Cuyo, Mendoza, Argentina.

**Supplementary Table S3.** Pairwise Pearson correlation coefficient values (r) among carrot bioactive compounds and antioxidant capacity for accessions 1-7, presenting high anthocyanin concentration (> 1000 mg kg<sup>-1</sup> fw), for years 2018 and 2019

|                     | TAC <sub>SPEC</sub> | TAC <sub>HPLC</sub> | Cy3XG   | Cy3XGG  | Cy3XSGG | Cy3XFGG | Cy3XCGG | TAA     | TNAA    | TPC     | ABTS    | FRAP    | DPPH    | ORAC   | β-carot | Lutein |
|---------------------|---------------------|---------------------|---------|---------|---------|---------|---------|---------|---------|---------|---------|---------|---------|--------|---------|--------|
| TAC <sub>SPEC</sub> |                     | 0.80***             | 0.68*** | 0.29    | 0.04    | 0.52*** | 0.69*** | 0.63*** | 0.68*** | 0.87*** | 0.50**  | 0.50**  | 0.49**  | 0.27   | 0.13    | 0.01   |
| TAC <sub>HPLC</sub> | 0.80***             |                     | 0.67*** | 0.40    | 0.07    | 0.72*** | 0.86*** | 0.93*** | 0.69*** | 0.90*** | 0.57**  | 0.44**  | 0.50**  | 0.35*  | 0.34    | 0.04   |
| Cy3XG               | 0.75***             | 0.64***             |         | 0.09    | -0.19   | 0.41    | 0.62*** | 0.38*   | 0.98**  | 0.60**  | 0.41**  | 0.68*** | 0.37    | 0.24   | 0.15    | -0.29  |
| Cy3XGG              | 0.35**              | 0.44**              | 0.48*   |         | 0.48    | -0.14   | 0.09    | 0.23*   | 0.39*** | 0.20    | 0.07    | 0.05    | 0.08    | 0.26   | -0.07   | -0.38  |
| Cy3XSGG             | 0.33**              | 0.44**              | -0.31   | 0.30    |         | -0.56*  | -0.38   | 0.35**  | 0.20    | 0.12    | -0.16   | -0.38   | -0.41   | -0.15  | -0.51   | -0.53  |
| Cy3XFGG             | 0.41***             | 0.77***             | 0.57*** | 0.09    | -0.59** |         | 0.91*** | 0.75*** | 0.33*   | 0.63*** | 0.56*   | 0.41**  | 0.66*** | 0.36** | 0.54**  | 0.67   |
| Cy3XCGG             | 0.56***             | 0.86***             | 0.57*** | 0.08    | -0.32** | 0.91*** |         | 0.81*** | 0.57*   | 0.76*** | 0.54**  | 0.42**  | 0.64*** | 0.36** | 0.61**  | 0.26   |
| TAA                 | 0.71***             | 0.80***             | 0.46    | 0.11    | 0.37**  | 0.76*** | 0.89*** |         | 0.38    | 0.86**  | 0.54*** | 0.26*   | 0.47*   | 0.31   | 0.22    | 0.38   |
| TNAA                | 0.66***             | 0.80***             | 0.98*** | 0.64*** | 0.07    | 0.48*   | 0.48*   | 0.43*   |         | 0.58*   | 0.38*   | 0.62**  | 0.35*   | 0.27   | 0.24    | 0.11   |
| TPC                 | 0.77***             | 0.83***             | 0.56*** | 0.32*   | 0.01    | 0.65*** | 0.72*** | 0.80*** | 0.56**  |         | 0.47**  | 0.43*** | 0.43*** | 0.21   | 0.19    | 0.01   |
| ABTS                | 0.48***             | 0.56***             | 0.42*** | 0.30*   | 0.24    | 0.57*** | 0.55*** | 0.50*** | 0.45**  | 0.52*** |         | 0.47**  | 0.75*** | 0.04   | 0.23    | 0.23   |
| FRAP                | 0.38**              | 0.48***             | 0.44*** | 0.20    | 0.11    | 0.48*** | 0.45*** | 0.46*** | 0.36*   | 0.47*** | 0.44*** |         | 0.36**  | 0.44** | -0.20   | -0.12  |
| DPPH                | -                   | -                   | -       | -       | -       | -       | -       | -       | -       | -       | -       | -       |         | 0.02   | 0.30    | 0.41   |
| ORAC                | -                   | -                   | -       | -       | -       | -       | -       | -       | -       | -       | -       | -       | -       |        | 0.22    | 0.05   |
| β-carot.            | -                   | -                   | -       | -       | -       | -       | -       | -       | -       | -       | -       | -       | -       | -      |         | 0.25   |
| Lutein              | -                   | -                   | -       | -       | -       | -       | -       | -       | -       | -       | -       | -       | -       | -      | -       |        |

The diagonal gray boxes separate data for 2018 (upper half) and 2019 (lower half). TAC<sub>SPEC</sub>: total anthocyanin content by spectrophotometry; TAC<sub>HPLC</sub>: total anthocyanin content by HPLC; TAA: total acylated anthocyanins; TNAA: total non-acylated anthocyanins; TPC: total phenolics content. The full name of individual anthocyanin pigments (Cy3XG, Cy3XGG, Cy3XSGG, Cy3XFGG, Cy3XCGG) are presented in Table 2. Antioxidant capacity was estimated by four analytical methods (ABTS, FRAP, DPPH, and ORAC). \*, \*\*, \*\*\* indicate significant correlation at p<0.05, p<0.01, and p<0.001, respectively.

**Supplementary Table S4.** Pairwise Pearson correlation coefficient values (r) among carrot bioactive compounds and antioxidant capacity for accessions 8-17, presenting intermediate anthocyanin concentration (80-1000 mg kg<sup>-1</sup> fw), for years 2018 and 2019

|                     | TAC <sub>SPEC</sub> | TAC <sub>HPLC</sub> | Cy3XG   | Cy3XGG  | Cy3XSGG | Cy3XFGG | Cy3XCGG | TAA     | TNAA    | TPC     | ABTS    | FRAP    | DPPH    | ORAC    | β-carot | Lutein |
|---------------------|---------------------|---------------------|---------|---------|---------|---------|---------|---------|---------|---------|---------|---------|---------|---------|---------|--------|
| TAC <sub>SPEC</sub> |                     | 0.76***             | 0.36**  | 0.42*** | 0.63*** | 0.49*** | 0.52*** | 0.57*** | 0.39*** | 0.78*** | 0.78*** | 0.43*** | 0.64*** | 0.38**  | 0.26    | 0.15   |
| TAC <sub>HPLC</sub> | 0.60***             |                     | 0.36**  | 0.46*** | 0.92*** | 0.41*** | 0.51*** | 0.98*** | 0.49*** | 0.82*** | 0.73*** | 0.54*** | 0.54*** | 0.51*** | 0.26    | 0.03   |
| Cy3XG               | 0.56***             | 0.48***             |         | 0.36**  | 0.02    | 0.02    | 0.22    | 0.14    | 0.38**  | 0.39*   | 0.08    | 0.31*   | 0.19    | 0.05    | 0.24    | 0.26   |
| Cy3XGG              | 0.48***             | 0.47***             | 0.39*** |         | 0.11    | 0.03    | 0.04    | 0.1     | 0.98*** | 0.65*** | 0.10    | 0.32*   | 0.26    | 0.15    | 0.12    | 0.07   |
| Cy3XSGG             | 0.34***             | 0.44***             | 0.13    | 0.02    |         | 0.03    | 0.23    | 0.42*** | 0.10    | 0.05    | 0.83*** | 0.51*** | 0.68*** | 0.45**  | 0.01    | 0.10   |
| Cy3XFGG             | 0.42***             | 0.83***             | 0.54*** | 0.45*   | 0.11    |         | 0.73**  | 0.92*** | 0.08    | 0.74*** | 0.43**  | 0.33**  | 0.37*   | 0.31**  | 0.12    | 0.16   |
| Cy3XCGG             | 0.03                | 0.31*               | 0.03    | 0.48*   | 0.02    | 0.32**  |         | 0.50*** | 0.22    | 0.39*** | 0.40**  | 0.34**  | 0.36*   | 0.26*   | 0.12    | 0.29   |
| TAA                 | 0.56***             | 0.99***             | 0.39    | 0.42    | 0.49*** | 0.81*** | 0.32**  |         | 0.13    | 0.82*** | 0.73*** | 0.52*** | 0.64*** | 0.53*** | 0.25    | 0.13   |
| TNAA                | 0.62***             | 0.55***             | 0.96*** | 0.64*** | 0.11    | 0.60*   | 0.16    | 0.46*   |         | 0.22    | 0.12    | 0.38*   | 0.29    | 0.14    | 0.21    | 0.28   |
| TPC                 | 0.45***             | 0.66***             | 0.35**  | 0.35**  | 0.34*** | 0.40**  | 0.15    | 0.65*** | 0.40**  |         | 0.76*** | 0.47*** | 0.64*** | 0.65*** | 0.03    | 0.08   |
| ABTS                | 0.32*               | 0.44*               | 0.08    | 0.30*   | 0.01    | 0.81**  | 0.32**  | 0.35**  | 0.03    | 0.30*   |         | 0.56*** | 0.75*** | 0.49*** | 0.11    | 0.04   |
| FRAP                | 0.35*               | 0.21*               | 0.04    | 0.06    | 0.47*** | 0.09    | 0.06    | 0.23*   | 0.05    | 0.27*   | 0.03    |         | 0.36**  | 0.48*   | 0.21    | 0.05   |
| DPPH                | -                   | -                   | -       | -       | -       | -       | -       | -       | -       | -       | -       | -       |         | 0.11    | 0.39    | 0.03   |
| ORAC                | -                   | -                   | -       | -       | -       | -       | -       | -       | -       | -       | -       | -       | -       |         | 0.12    | 0.07   |
| β-carot.            | -                   | -                   | -       | -       | -       | -       | -       | -       | -       | -       | -       | -       | -       | -       |         | 0.33   |
| Lutein              | -                   | -                   | -       | -       | -       | -       | -       | -       | -       | -       | -       | -       | -       | -       | -       |        |

The diagonal gray boxes separate data for 2018 (upper half) and 2019 (lower half). TAC<sub>SPEC</sub>: total anthocyanin content by spectrophotometry; TAC<sub>HPLC</sub>: total anthocyanin content by HPLC; TAA: total acylated anthocyanins; TNAA: total non-acylated anthocyanins; TPC: total phenolics content. The full name of individual anthocyanin pigments (Cy3XG, Cy3XGG, Cy3XSGG, Cy3XFGG, Cy3XCGG) are presented in Table 2. Antioxidant capacity was estimated by four analytical methods (ABTS, FRAP, DPPH, and ORAC). \*, \*\*, \*\*\* indicate significant correlation at p<0.05, p<0.01, and p<0.001, respectively.

**Supplementary Table S5.** Pairwise Pearson correlation coefficient values (r) among carrot bioactive compounds and antioxidant capacity for accessions 18-29, presenting low anthocyanin concentration (< 80 mg kg<sup>-1</sup> fw), for years 2018 and 2019

|                     | TAC <sub>SPEC</sub> | TAC <sub>HPLC</sub> | Cy3XG   | Cy3XGG  | Cy3XSGG | Cy3XFGG | Cy3XCGG | TAA     | TNAA    | TPC     | ABTS   | FRAP   | DPPH   | ORAC   | β-carot | Lutein |
|---------------------|---------------------|---------------------|---------|---------|---------|---------|---------|---------|---------|---------|--------|--------|--------|--------|---------|--------|
| TAC <sub>SPEC</sub> |                     | 0.37**              | 0.59*** | 0.39**  | 0.07    | 0.47*** | 0.46*** | 0.35**  | 0.53**  | 0.61*** | 0.09   | 0.21*  | 0.17*  | 0.23*  | 0.36    | 0.34   |
| TAC <sub>HPLC</sub> | 0.53***             |                     | 0.66*** | 0.46*** | 0.87*** | 0.96*** | 0.85*** | 0.99*** | 0.70*** | 0.66*** | 0.33** | 0.37** | 0.37** | 0.23*  | 0.31    | 0.06   |
| Cy3XG               | 0.22*               | 0.36**              |         | 0.17    | 0.33**  | 0.43*   | 0.72**  | 0.34*   | 0.85*** | 0.12    | 0.24   | 0.09   | 0.29*  | 0.08   | 0.25    | 0.30   |
| Cy3XGG              | 0.06                | 0.55**              | 0.32**  |         | 0.17    | 0.43*   | 0.65*** | 0.42*   | 0.66*** | 0.10    | 0.41** | 0.08   | 0.30*  | 0.42*  | 0.01    | 0.05   |
| Cy3XSGG             | 0.02                | 0.53**              | 0.01    | 0.12    |         | 0.71**  | 0.65*** | 0.88*** | 0.42*   | 0.43*** | 0.27*  | 0.68** | 0.57** | 0.03   | 0.34    | 0.15   |
| Cy3XFGG             | 0.32**              | 0.84***             | 0.52*   | 0.26    | 0.003   |         | 0.89*** | 0.96*** | 0.22    | 0.44*** | 0.18   | 0.49** | 0.37** | 0.09   | 0.35    | 0.42   |
| Cy3XCGG             | 0.09                | 0.70***             | 0.67*   | 0.38*   | 0.34*   | 0.99*** |         | 0.86*** | 0.23    | 0.47*** | 0.43** | 0.42*  | 0.27*  | 0.17   | 0.38    | 0.20   |
| TAA                 | 0.37*               | 0.99***             | 0.29*   | 0.29*   | 0.57**  | 0.65*** | 0.65**  |         | 0.20    | 0.47*** | 0.33** | 0.36** | 0.48** | 0.05   | 0.37    | 0.34   |
| TNAA                | 0.33*               | 0.47**              | 0.94*** | 0.63*** | 0.05    | 0.48*   | 0.68*   | 0.15    |         | 0.15    | 0.03   | 0.43*  | 0.43*  | 0.29*  | 0.29    | 0.13   |
| TPC                 | 0.23*               | 0.32**              | 0.08    | 0.08    | 0.49**  | 0.002   | 0.003   | 0.32**  | 0.50*   |         | 0.21*  | 0.01   | 0.01   | 0.27*  | 0.14    | 0.11   |
| ABTS                | 0.26*               | 0.33**              | 0.07    | 0.07    | 0.30*   | 0.05    | 0.05    | 0.34**  | 0.09    | 0.35*   |        | 0.01   | 0.27*  | 0.51** | 0.01    | 0.03   |
| FRAP                | 0.08                | 0.23**              | 0.06    | 0.02    | 0.37*   | 0.11    | 0.11    | 0.26*   | 0.06    | 0.09    | 0.19   |        | 0.23*  | 0.11   | 0.28    | 0.30   |
| DPPH                | -                   | -                   | -       | -       | -       | -       | -       | -       | -       | -       | -      | -      |        | 0.11   | 0.24    | 0.14   |
| ORAC                | -                   | -                   | -       | -       | -       | -       | -       | -       | -       | -       | -      | -      | -      |        | 0.04    | 0.09   |
| β-carot.            | -                   | -                   | -       | -       | -       | -       | -       | -       | -       | -       | -      | -      | -      | -      |         | 0.50*  |
| Lutein              | -                   | -                   | -       | -       | -       | -       | -       | -       | -       | -       | -      | -      | -      | -      | -       |        |

The diagonal gray boxes separate data for 2018 (upper half) and 2019 (lower half). TAC<sub>SPEC</sub>: total anthocyanin content by spectrophotometry; TAC<sub>HPLC</sub>: total anthocyanin content by HPLC; TAA: total acylated anthocyanins; TNAA: total non-acylated anthocyanins; TPC: total phenolics content. The full name of individual anthocyanin pigments (Cy3XG, Cy3XGG, Cy3XSGG, Cy3XFGG, Cy3XCGG) are presented in Table 2. Antioxidant capacity was estimated by four analytical methods (ABTS, FRAP, DPPH, and ORAC). \*, \*\*, \*\*\* indicate significant correlation at p<0.05, p<0.01, and p<0.001, respectively.



**Supplementary Table S6.** Cohen's d effect size estimates among sub-classes of carrot accessions with high (H) (>1000 mg kg<sup>-1</sup> fw), intermediate (I) (80-1000 mg kg<sup>-1</sup> fw), and low anthocyanin content (L) (<80 mg kg<sup>-1</sup> fw), for 16 variables and two years.

|                           | 2018     |      |      | 2019     |      |      |
|---------------------------|----------|------|------|----------|------|------|
|                           | H        | I    | L    | H        | I    | L    |
| <b>Cy3XGG</b>             | <b>H</b> | 0.00 | -    | <b>H</b> | 0.00 | -    |
|                           | <b>I</b> | 1.95 | 0.00 | <b>M</b> | 1.99 | 0.00 |
|                           | <b>L</b> | 1.94 | 1.57 | <b>L</b> | 2.15 | 0.91 |
| <b>Cy3XCGG</b>            | <b>H</b> | 0.00 | -    | <b>H</b> | 0.00 | -    |
|                           | <b>I</b> | 1.08 | 0.00 | <b>M</b> | 1.02 | 0.00 |
|                           | <b>L</b> | 1.13 | 1.36 | <b>L</b> | 1.11 | 1.09 |
| <b>Cy3XFGG</b>            | <b>H</b> | 0.00 | -    | <b>H</b> | 0.00 | -    |
|                           | <b>I</b> | 1.37 | 0.00 | <b>M</b> | 1.37 | 0.00 |
|                           | <b>L</b> | 1.65 | 2.89 | <b>L</b> | 1.97 | 1.97 |
| <b>Cy3XG</b>              | <b>H</b> | 0.00 | -    | <b>H</b> | 0.00 | -    |
|                           | <b>I</b> | 1.26 | 0.00 | <b>M</b> | 1.50 | 0.00 |
|                           | <b>L</b> | 1.26 | 1.11 | <b>L</b> | 1.63 | 1.15 |
| <b>Cy3XSGG</b>            | <b>H</b> | 0.00 | -    | <b>H</b> | 0.00 | -    |
|                           | <b>I</b> | 1.16 | 0.00 | <b>M</b> | 1.14 | 0.00 |
|                           | <b>L</b> | 1.45 | 0.68 | <b>L</b> | 1.40 | 0.78 |
| <b>TAC<sub>SPEC</sub></b> | <b>H</b> | 0.00 | -    | <b>H</b> | 0.00 | -    |
|                           | <b>I</b> | 2.79 | 0.00 | <b>M</b> | 3.06 | 0.00 |
|                           | <b>L</b> | 3.45 | 1.82 | <b>L</b> | 3.83 | 2.24 |
| <b>TAC<sub>HPLC</sub></b> | <b>H</b> | 0.00 | -    | <b>H</b> | 0.00 | -    |
|                           | <b>I</b> | 2.54 | 0.00 | <b>M</b> | 2.51 | 0.00 |
|                           | <b>L</b> | 2.98 | 1.79 | <b>L</b> | 3.19 | 2.22 |
| <b>TAA</b>                | <b>H</b> | 0.00 | -    | <b>H</b> | 0.00 | -    |
|                           | <b>I</b> | 2.44 | 0.00 | <b>M</b> | 2.36 | 0.00 |
|                           | <b>L</b> | 3.03 | 1.72 | <b>L</b> | 3.19 | 2.20 |
| <b>TNAA</b>               | <b>H</b> | 0.00 | -    | <b>H</b> | 0.00 | -    |
|                           | <b>I</b> | 1.58 | 0.00 | <b>M</b> | 1.75 | 0.00 |
|                           | <b>L</b> | 1.58 | 1.43 | <b>L</b> | 1.90 | 1.24 |
| <b>TPC</b>                | <b>H</b> | 0.00 | -    | <b>H</b> | 0.00 | -    |
|                           | <b>I</b> | 2.36 | 0.00 | <b>M</b> | 2.78 | 0.00 |
|                           | <b>L</b> | 3.11 | 1.36 | <b>L</b> | 4.45 | 1.92 |
| <b>ABTS</b>               | <b>H</b> | 0.00 | -    | <b>H</b> | 0.00 | -    |
|                           | <b>I</b> | 2.13 | 0.00 | <b>M</b> | 2.02 | 0.00 |
|                           | <b>L</b> | 3.25 | 2.28 | <b>L</b> | 3.25 | 2.35 |
| <b>FRAP</b>               | <b>H</b> | 0.00 | -    | <b>H</b> | 0.00 | -    |
|                           | <b>I</b> | 2.59 | 0.00 | <b>M</b> | 3.25 | 0.00 |
|                           | <b>L</b> | 3.61 | 1.91 | <b>L</b> | 3.95 | 1.30 |
| <b>DPPH</b>               | <b>H</b> | 0.00 | -    |          |      |      |
|                           | <b>I</b> | 2.29 | 0.00 |          |      |      |
|                           | <b>L</b> | 2.40 | 0.40 |          |      |      |
| <b>ORAC</b>               | <b>H</b> | 0.00 | -    |          |      |      |
|                           | <b>I</b> | 3.25 | 0.00 |          |      |      |
|                           | <b>L</b> | 5.27 | 1.74 |          |      |      |
| <b>Lutein</b>             | <b>H</b> | 0.00 | -    |          |      |      |
|                           | <b>I</b> | 0.06 | 0.00 |          |      |      |
|                           | <b>L</b> | 0.22 | 0.27 |          |      |      |
| <b>β-carotene</b>         | <b>H</b> | 0.00 | -    |          |      |      |
|                           | <b>I</b> | 2.20 | 0.00 |          |      |      |
|                           | <b>L</b> | 1.22 | 0.26 |          |      |      |
